# Supplementary material for: Complete bio-degradation of poly(butylene adipate-co-terephthalate) via engineered cutinases
Source: Springer Nature journal article supplement (doi:10.1038/s41467-023-37374-3), 2023-03-24
Supplement: MOESM1 [file 41467_2023_37374_MOESM1_ESM.pdf]

# Supplementary Information

## **Complete bio-degradation of poly(butylene adipate-co-terephthalate) via engineered cutinases**

Yu Yang<sup>1,4</sup>, Jian Min<sup>1,4</sup>, Ting Xue<sup>1,4</sup>, Pengcheng Jiang<sup>1</sup>, Xin Liu<sup>1</sup>, Rouming Peng<sup>1</sup>, Jian-Wen Huang<sup>1</sup>, Yingying Qu<sup>1</sup>, Xian Li<sup>1</sup>, Ning Ma<sup>2</sup>, Fang-Chang Tsai<sup>2</sup>, Longhai Dai<sup>1</sup>, Qi Zhang<sup>3</sup>, Yingle Liu<sup>3\*</sup>, Chun-Chi Chen<sup>1\*</sup>, and Rey-Ting Guo<sup>1\*</sup>

<sup>1</sup>State Key Laboratory of Biocatalysis and Enzyme Engineering, Hubei Hongshan Laboratory, Hubei Collaborative Innovation Center for Green Transformation of Bio-Resources, Hubei Key Laboratory of Industrial Biotechnology, School of Life Sciences, Hubei University, Wuhan 430062, PR China

<sup>2</sup>Hubei Key Laboratory of Polymer Materials, Key Laboratory for the Green Preparation and Application of Functional Materials (Ministry of Education), Hubei Collaborative Innovation Center for Advanced Organic Chemical Materials, School of Materials Science and Engineering, Hubei University, Wuhan 430062, PR China

<sup>3</sup>State Key Laboratory of Virology, College of Life Sciences, Wuhan University, Wuhan 430072, PR China

<sup>4</sup>These authors contributed equally: Yu Yang, Jian Min, and Ting Xue

\*Corresponding authors. E-mail addresses: [mvlwu@whu.edu.cn](mailto:mvlwu@whu.edu.cn) (Y. Liu), [ccckate0722@hubu.edu.cn](mailto:ccckate0722@hubu.edu.cn) (C.-C. Chen), [guoreyting@hubu.edu.cn](mailto:guoreyting@hubu.edu.cn) (R.-T. Guo).

**Supplementary Table 1.** Summary of activity of enzyme-mediated PBAT hydrolytic activity.

| Enzyme     | Classification | Source                               | Yield (mg/L) | Activity (mol/mol)* | PBAT           | Condition   | Literature               |
|------------|----------------|--------------------------------------|--------------|---------------------|----------------|-------------|--------------------------|
| PfL1       | Lipase         | <i>Pelosinus fermentans</i>          | -            | ~ 30<br>~ 130       | Film<br>Milled | 50 °C, 72 h | (AMB, 2016) <sup>1</sup> |
| PpEst      | Esterase       | <i>Pseudomonas pseudoalcaligenes</i> | -            | ~ 8<br>~ 70         | Film<br>Milled | 65 °C, 72 h | (AMB, 2017) <sup>2</sup> |
| Cbotu_EstB | Esterase       | <i>Clostridium botulinum</i>         | -            | < 30                | Not specified  | 37 °C, 72 h | (BB, 2016) <sup>3</sup>  |
| TfCut      | Cutinase       | <i>Thermobifida fusca</i>            | 13.5         | 5198                | Film           | 70 °C, 48 h | This study               |
| IsPETase   | Cutinase       | <i>Ideonella sakaiensis</i>          | 5.1          | 4868                | Film           | 30 °C, 48 h | This study               |
| PbPL       | Cutinase       | <i>Polyangium brachysporum</i>       | 1.1          | UD                  | Film           | 30 °C, 48 h | This study               |
| BurPL      | Cutinase       | <i>Burkholderiales</i> bacterium     | 1.5          | 3208                | Film           | 35 °C, 48 h | This study               |
| TcCut      | Cutinase       | <i>Thermobifida cellulosilytica</i>  | 16.1         | 5361                | Film           | 65 °C, 48 h | This study               |

\*The activity is the quantitation of products containing TPA and BTa (mol) per mol enzymes. UD, undetectable.

**Supplementary Table 2.** Representative degradation products and their theoretical mass in a negative ion ( $M - H^-$ ) mode.

| PBAT hydrolytic products     | Mass to charge<br>Ratio (m/z) | Present in this study |
|------------------------------|-------------------------------|-----------------------|
| Products containing one TPA  |                               |                       |
| TPA (or Ta)*                 | 165.0                         | <b>1</b>              |
| BTa                          | 237.1                         | <b>2</b>              |
| BTaB                         | 309.1                         |                       |
| ABTa                         | 365.1                         | <b>3</b>              |
| ABTaB                        | 437.2                         | possible for <b>5</b> |
| ABTaBA                       | 565.2                         | possible for <b>6</b> |
| BABTa                        | 437.2                         | possible for <b>5</b> |
| BABTaB                       | 509.3                         |                       |
| BABTaBA                      | 637.3                         |                       |
| BABTaBAB                     | 709.4                         |                       |
| ABABTa                       | 565.2                         | possible for <b>6</b> |
| Products containing two TPAs |                               |                       |
| TaBTa                        | 385.1                         | <b>4</b>              |
| BTaBTa                       | 457.2                         |                       |
| ABTaBTaB                     | 657.3                         |                       |
| BTaBTaB                      | 529.2                         |                       |

\*TPA or Ta, terephthalic acid; B, 1,4-butanediol; A, adipic acid

**Supplementary Table 3.** Time course of TPA and BTa production by WT and *TjCut*-DM. The amounts of TPA and BTa are calibrated with the counterpart standard samples.

| Time (h) | TPA ( $\mu$ M)    |                   |       | BTa ( $\mu$ M)    |                   |      |
|----------|-------------------|-------------------|-------|-------------------|-------------------|------|
|          | WT <i>TjCut</i>   | <i>TjCut</i> -DM  | Fold  | WT <i>TjCut</i>   | <i>TjCut</i> -DM  | Fold |
| 2        | 4.3 $\pm$ 1       | 61.1 $\pm$ 6.1    | 14.22 | 306.6 $\pm$ 27.5  | 413.5 $\pm$ 31.1  | 1.35 |
| 4        | 52.2 $\pm$ 5.2    | 174.5 $\pm$ 29    | 3.34  | 710.9 $\pm$ 63.8  | 763 $\pm$ 72.6    | 1.07 |
| 8        | 114.1 $\pm$ 15.1  | 442.8 $\pm$ 18.8  | 3.88  | 978.8 $\pm$ 30.3  | 1085.9 $\pm$ 47.2 | 1.11 |
| 12       | 309.8 $\pm$ 55.1  | 895.5 $\pm$ 72.9  | 2.89  | 1203.3 $\pm$ 71.6 | 1165 $\pm$ 141.9  | 0.97 |
| 24       | 628.4 $\pm$ 116.6 | 1568.6 $\pm$ 41.4 | 2.5   | 1192.5 $\pm$ 77.5 | 575.6 $\pm$ 141.7 | 0.48 |
| 36       | 852.2 $\pm$ 50.5  | 1697.5 $\pm$ 244  | 1.99  | 1312.5 $\pm$ 20.4 | 198.6 $\pm$ 60.3  | 0.15 |
| 48       | 705.3 $\pm$ 52.4  | 1748.2 $\pm$ 19.4 | 2.48  | 1114.1 $\pm$ 67.2 | 24.6 $\pm$ 2.1    | 0.02 |

**Supplementary Table 4.** Data collection and refinement statistics for crystal structures

|                                            | <i>Tj</i> Cut_DM_<br>Native               | <i>Tj</i> Cut_DM_<br>S170A   | <i>Tj</i> Cut_DM_<br>S170A_<br>MHET | <i>Tj</i> Cut_WT_<br>S170A   | <i>Tj</i> Cut_WT_<br>S170A_<br>MHET | <i>Is</i> PETase_<br>S160A<br>MHET                    |
|--------------------------------------------|-------------------------------------------|------------------------------|-------------------------------------|------------------------------|-------------------------------------|-------------------------------------------------------|
| <b>PDB code</b>                            | 7XTR                                      | 7XTS                         | 7XTT                                | 7XTU                         | 7XTV                                | 7XTW                                                  |
| <b>Data collection</b>                     |                                           |                              |                                     |                              |                                     |                                                       |
| Wavelength                                 | 1.34138                                   | 1.34138                      | 1.34138                             | 1.34138                      | 1.34138                             | 1.34138                                               |
| Space group                                | <i>P</i> 12 <sub>1</sub> 1                | <i>P</i> 12 <sub>1</sub> 1   | <i>P</i> 12 <sub>1</sub> 1          | <i>P</i> 3 <sub>1</sub> 21   | <i>P</i> 3 <sub>1</sub> 21          | <i>P</i> 2 <sub>1</sub> 2 <sub>1</sub> 2 <sub>1</sub> |
| Unit cell                                  |                                           |                              |                                     |                              |                                     |                                                       |
| a, b, c (Å)                                | 65.7, 42.0,<br>80.8                       | 66.0, 43.0,<br>80.4          | 65.8, 41.9,<br>80.9                 | 91.4, 91.4,<br>247.7         | 91.5, 91.5,<br>247.6                | 50.8, 50.9,<br>84.1                                   |
| α, β, γ (°)                                | 90, 92.6, 90                              | 90, 92.4, 90                 | 90, 92.1, 90                        | 90, 90, 120                  | 90, 90, 120                         | 90, 90, 90                                            |
| Resolution (Å)                             | 37.2 – 2.20<br>(2.23 – 2.20) <sup>a</sup> | 37.9 – 2.21<br>(2.24 – 2.21) | 32.6 – 1.82<br>(1.85 – 1.82)        | 40.0 – 2.43<br>(2.47 – 2.43) | 45.7 – 2.31<br>(2.35 – 2.31)        | 36.0 – 1.91<br>(1.94 – 1.91)                          |
| No. of<br>observed<br>reflections          | 21932 (860)                               | 22833 (882)                  | 39820 (1821)                        | 46206 (2221)                 | 53587 (2675)                        | 17534 (762)                                           |
| Redundancy                                 | 4.2 (3.0)                                 | 4.8 (3.0)                    | 4.4 (3.2)                           | 9.4 (4.5)                    | 5.2 (3.0)                           | 6.1 (5.5)                                             |
| Completeness<br>(%)                        | 96.5 (95.9)                               | 99.4 (99.4)                  | 99.6 (98.1)                         | 99.9 (99.8)                  | 99.6 (99.4)                         | 99.8 (98.3)                                           |
| Average <i>I</i> /σ ( <i>I</i> )           | 16.1 (8.5)                                | 8.5 (4.4)                    | 28.6 (9.0)                          | 10.2 (2.1)                   | 15.0 (4.7)                          | 22.9 (9.5)                                            |
| <i>R</i> <sub>merge</sub> (%) <sup>b</sup> | 6.4 (9.9)                                 | 12.0 (24.3)                  | 3.4 (10.5)                          | 15.9 (51.3)                  | 6.9 (16.0)                          | 5.3 (14.2)                                            |
| <b>Refinement<sup>c</sup></b>              |                                           |                              |                                     |                              |                                     |                                                       |
| <i>R</i> <sub>work</sub>                   | 17.1                                      | 17.9                         | 13.6                                | 17.5                         | 16.6                                | 13.6                                                  |
| <i>R</i> <sub>free</sub>                   | 23.3                                      | 23.7                         | 17.3                                | 22.6                         | 21.9                                | 14.9                                                  |
| r.m.s.d. bonds<br>(Å) <sup>d</sup>         | 0.007                                     | 0.007                        | 0.006                               | 0.009                        | 0.007                               | 0.007                                                 |
| r.m.s.d. angles<br>(°)                     | 0.868                                     | 0.927                        | 0.853                               | 0.978                        | 0.907                               | 0.940                                                 |
| <b>Ramachandran statistics<sup>e</sup></b> |                                           |                              |                                     |                              |                                     |                                                       |
| Most favored<br>(%)                        | 97.2                                      | 96.9                         | 97.7                                | 96.5                         | 96.6                                | 98.1                                                  |
| Allowed (%)                                | 2.8                                       | 3.1                          | 2.3                                 | 3.5                          | 3.4                                 | 1.9                                                   |
| Outliers (%)                               | 0                                         | 0                            | 0                                   | 0                            | 0                                   | 0                                                     |
| <b>Average B-factor (Å<sup>2</sup>)</b>    |                                           |                              |                                     |                              |                                     |                                                       |
| Protein/atoms                              | 15.8 / 3919                               | 21.3 / 3974                  | 10.5 / 4010                         | 18.6 / 7976                  | 16.5 / 7976                         | 10.9 / 1922                                           |
| Water/atoms                                | 21.4 / 338                                | 26.0 / 345                   | 22.1 / 683                          | 25.2 / 817                   | 23.3 / 867                          | 24.7 / 253                                            |
| MHET/atoms                                 | -                                         | -                            | 19.5 / 15                           | -                            | 23.9 / 30                           | 24.6 / 15                                             |
| Other Ligands<br>/atoms                    | 25.5 / 23                                 | 19.8 / 2                     | 20.0 / 19                           | 28.7 / 96                    | 30.0 / 80                           | 37.8 / 45                                             |

<sup>a</sup> Values in parentheses are for the highest resolution shell.<sup>b</sup>  $R_{\text{merge}} = \sum_{hkl} \sum_i |I_i(hkl) - \langle I(hkl) \rangle| / \sum_{hkl} \sum_i I_i(hkl)$ , in which the sum is over all the *i* measured reflections with equivalent miller indices *hkl*;  $\langle I(hkl) \rangle$  is the averaged intensity of these *i* reflections, and the grand sum is over all measured reflections in the data set.<sup>c</sup> All positive reflections were used in the refinement.<sup>d</sup> According to Engh and Huber<sup>4</sup>.<sup>e</sup> Calculated by using MolProbity<sup>5</sup>.

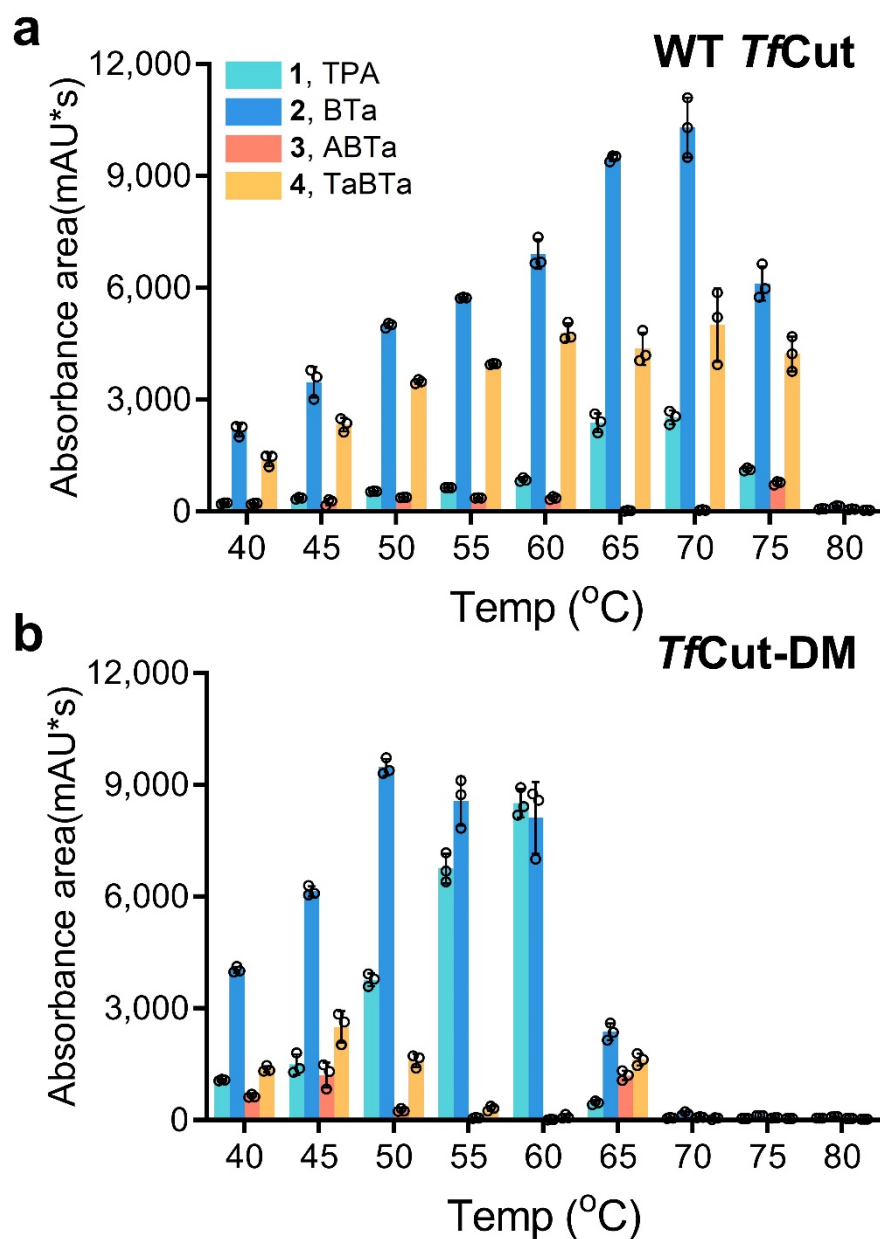

**Supplementary Fig. 1.** The temperature-dependent PBAT degradation rate of (a) WT *TfCut* and (b) *TfCut*-DM. The amounts of four intermediates in the reaction at 12 h were recorded by HPLC at the absorbance of 254 nm. Triplicate assay was conducted. Data are presented as mean values +/- standard deviation. The individual data points are shown as black circles. Source data are provided as a Source Data file.

**Compound 1**

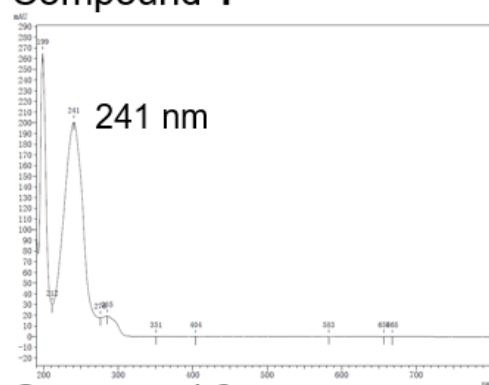

**Compound 2**

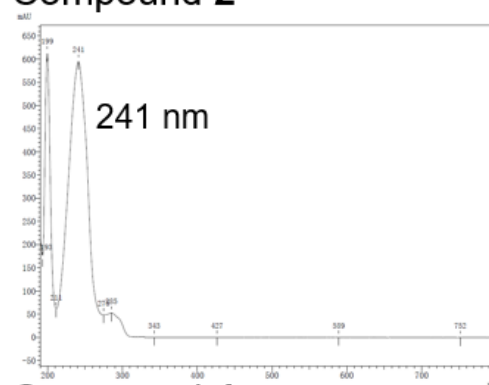

**Compound 3**

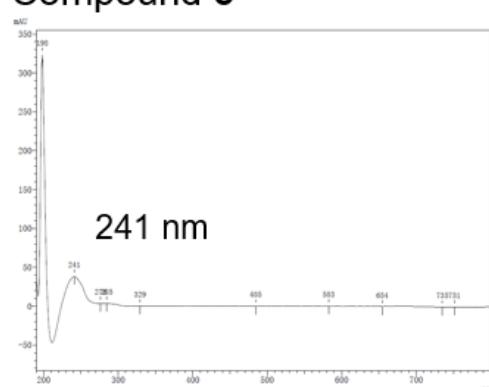

**Compound 4**

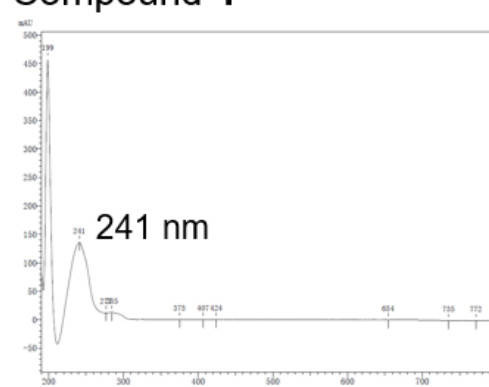

**Supplementary Fig. 2.** The four intermediates **1** – **4** show the maximal absorbance at 241 nm.

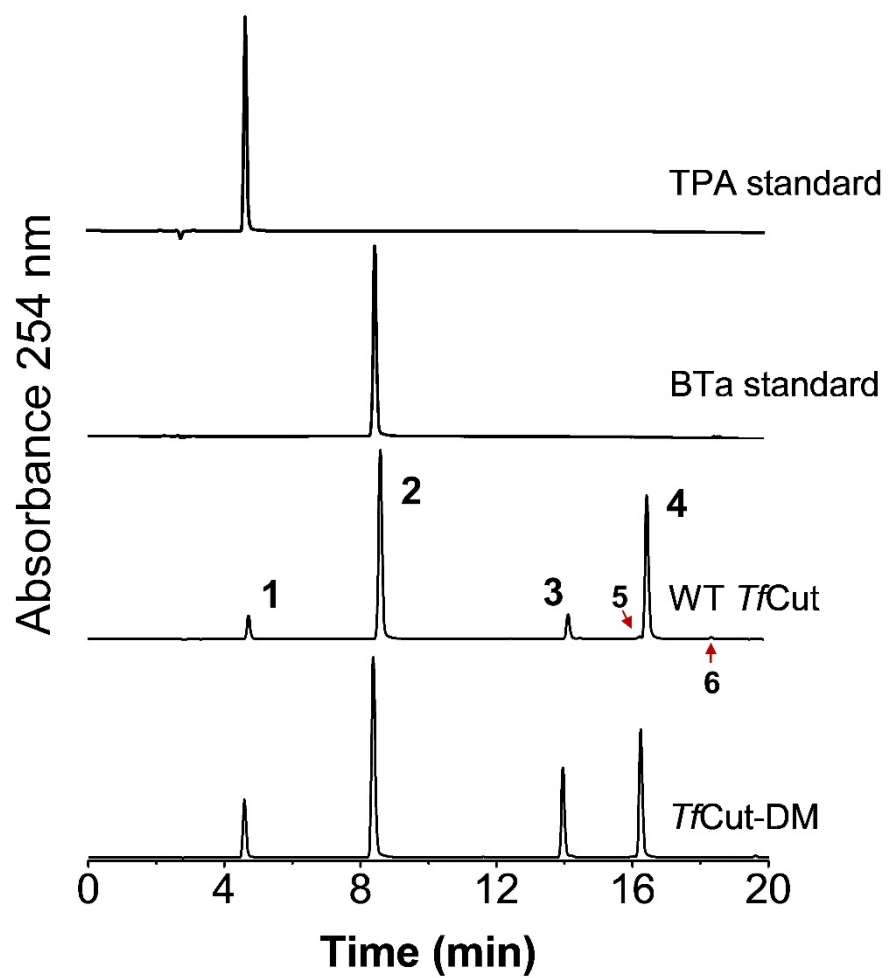

**Supplementary Fig. 3.** HPLC assay of PBAT hydrolyzed intermediates **1** - **6** and standard samples of TPA and BTa.



### One TPA-containing intermediates

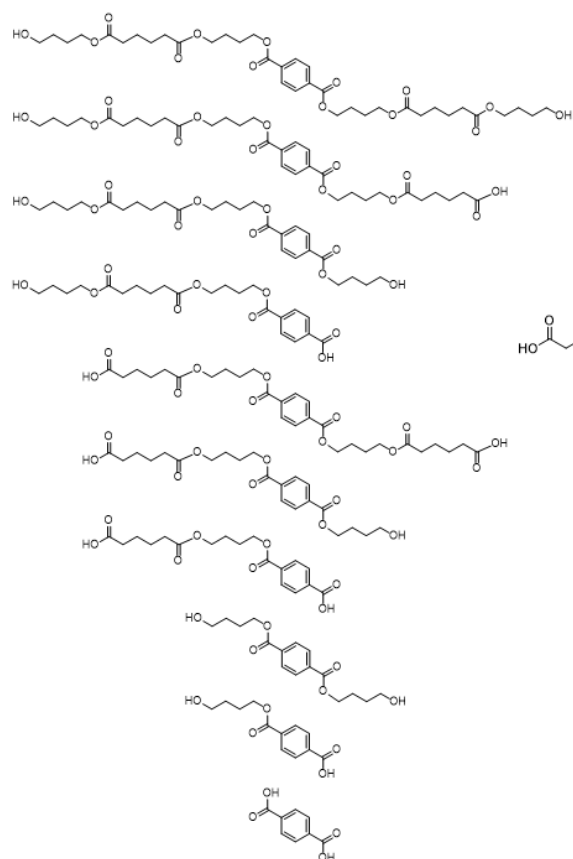

### Two TPA-containing intermediates

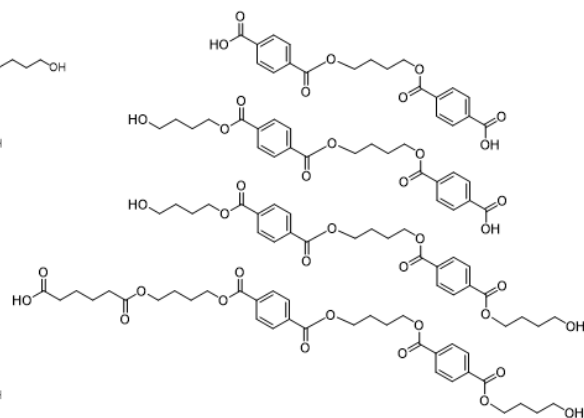

**Supplementary Fig. 4.** The speculation of hydrolyzed intermediates that contain one or two TPA during the PBAT-degradation.

## Compound 5

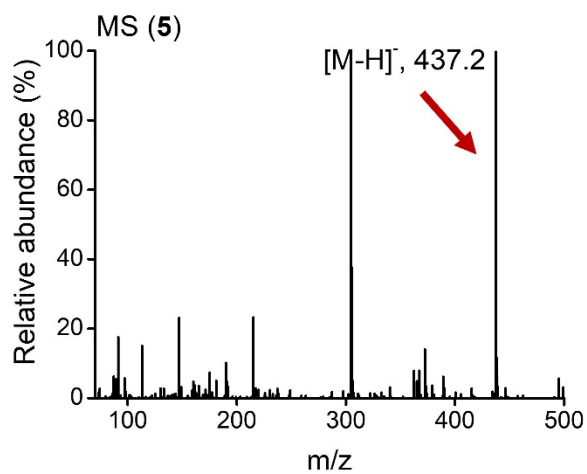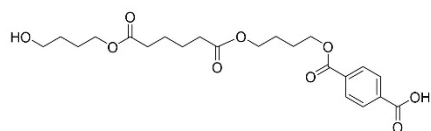

**BABTa**

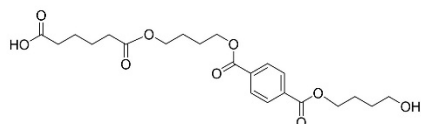

**ABTaB**

## Compound 6

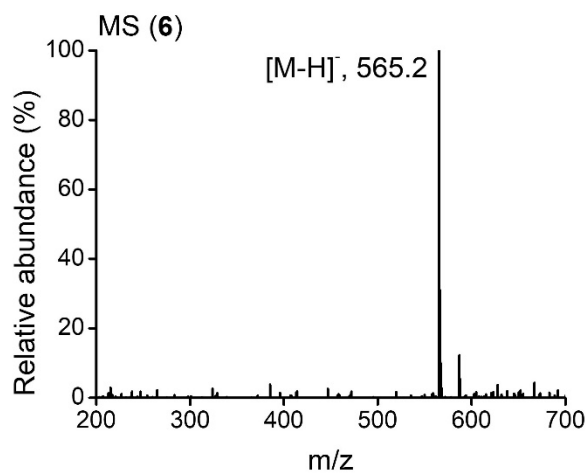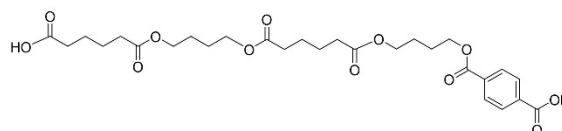

**ABABTa**

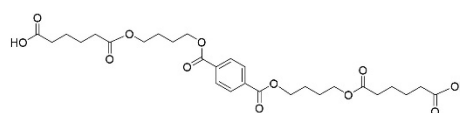

**ABTaBA**

**Supplementary Fig. 5.** The mass spectrum of compound **5** and **6**, and their possible structures. The structure of **5** is BABTa or ABTaB. The structure of **6** is ABABTa or ABTaBA.

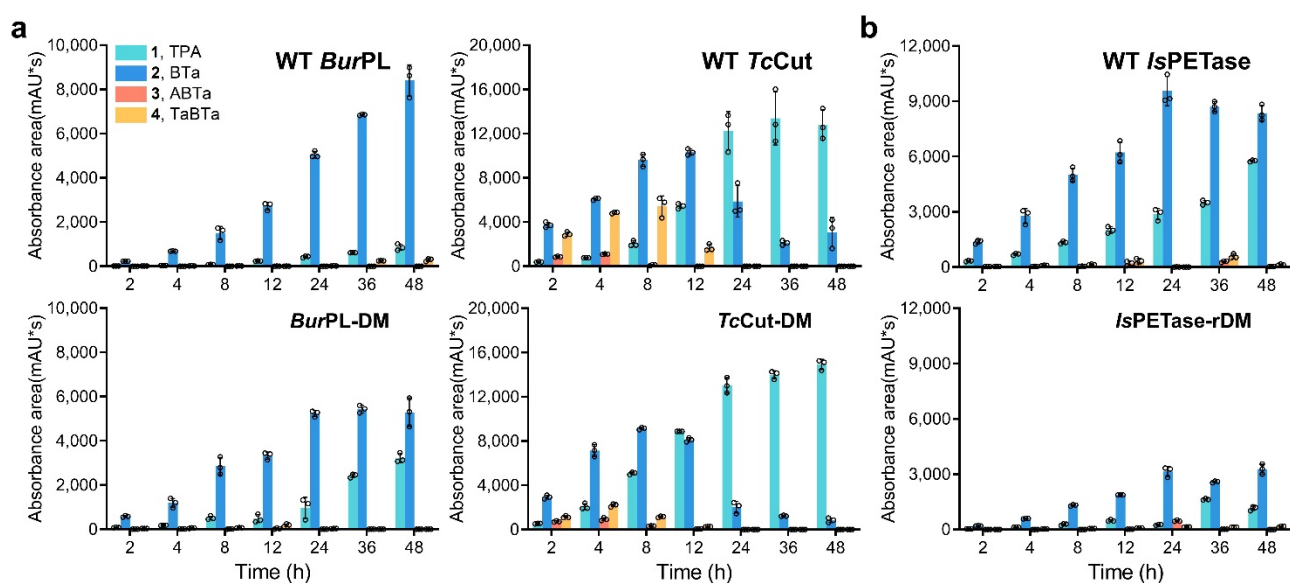

**Supplementary Fig. 6.** The time courses of PBAT-degradation mediated by **a**, WT and DM of *BurPL* and *TcCut*; **b**, *IsPETase* and its rDM variant. The rDM indicates that the Ser/Ile duo was mutated to His/Phe. The operating temperatures of each enzymes are: WT *BurPL*, 40 °C; *BurPL*-DM, 35 °C; WT *TcCut*, 65 °C; *TcCut*-DM, 60 °C; WT *IsPETase*, 30 °C; *IsPETase*-rDM, 30 °C. Triplicate assay was conducted. Data are presented as mean values +/- standard deviation. The individual data points are shown as black circles. Source data are provided as a Source Data file.

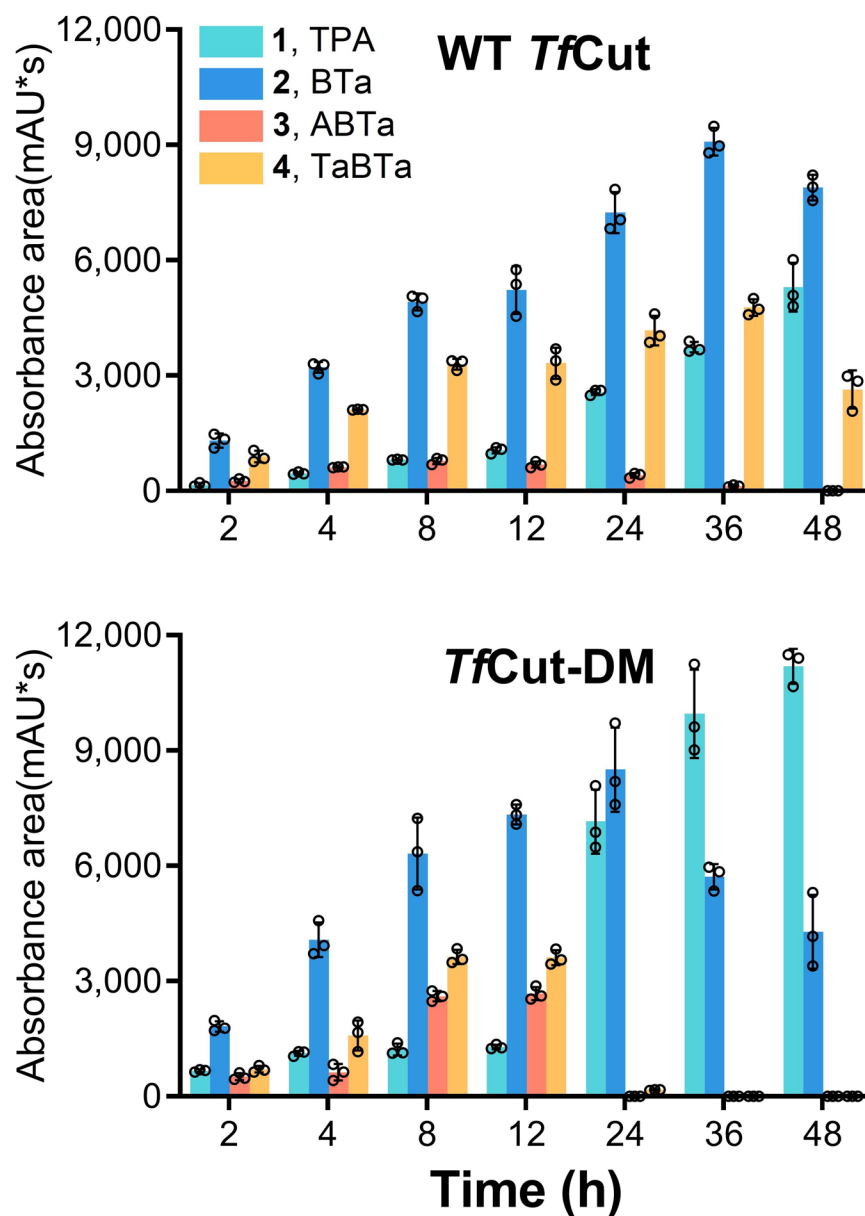

**Supplementary Fig. 7.** The time courses of WT *TfCut* (upper panel) and *TfCut*-DM (lower panel) mediated degradation of the UV-irradiated PBAT film. Triplicate assay was conducted. Data are presented as mean values  $\pm$  standard deviation. The individual data points are shown as black circles. Source data are provided as a Source Data file.

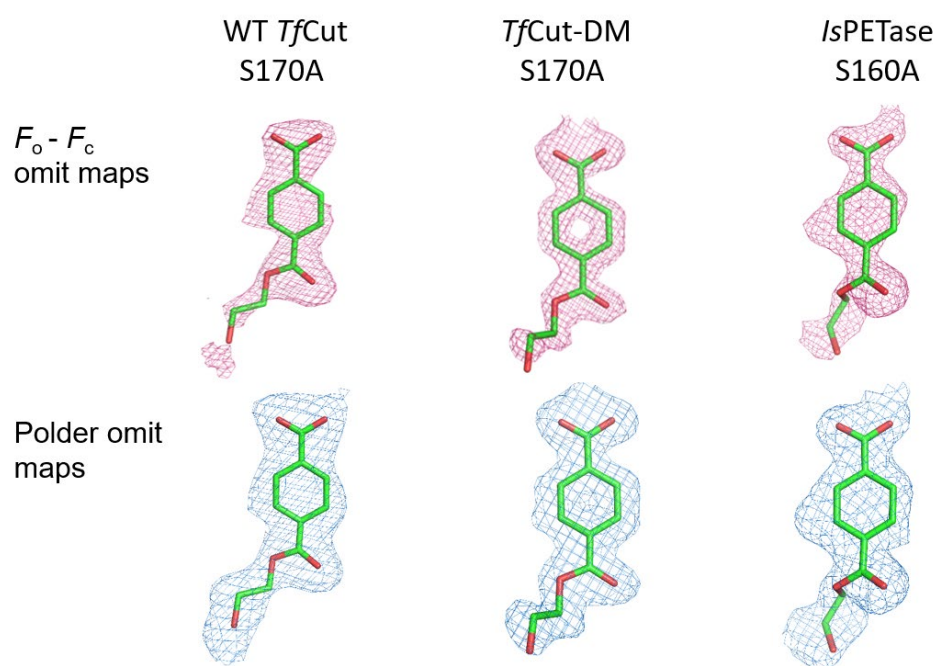

**Supplementary Fig. 8.** The  $F_o - F_c$  omit maps and polder omit maps of MHET in WT *Tf*Cut S170A, *Tf*Cut-DM S170A, and *Is*PETase S160A are contoured at 3.0  $\sigma$  in pink and blue, respectively.

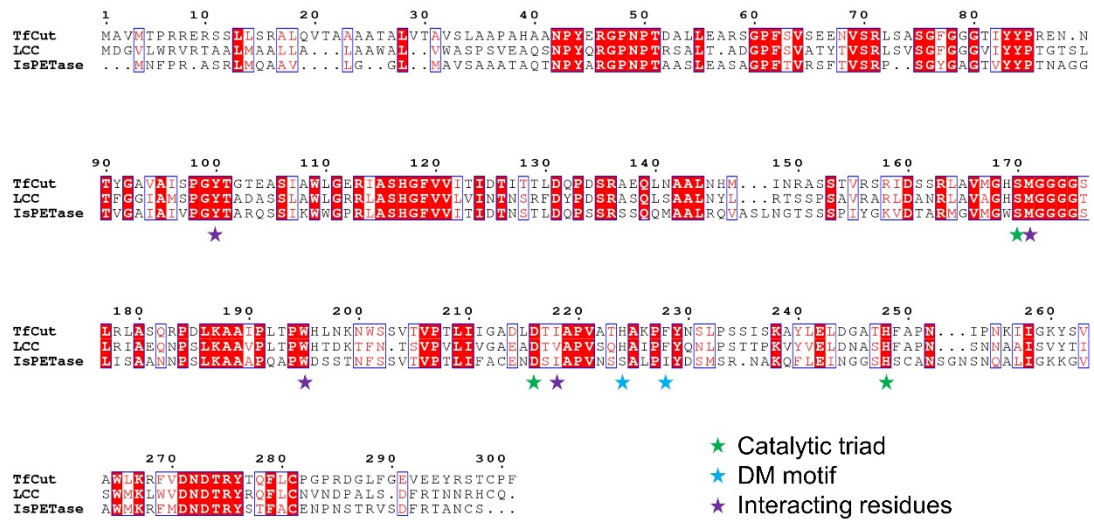

**Supplementary Fig. 9.** The sequence alignment of *TfCut*, *IsPETase*, and *LCC*. The residues of catalytic triad, DM, and interacting residues are labeled by green, blue, and purple stars respectively.

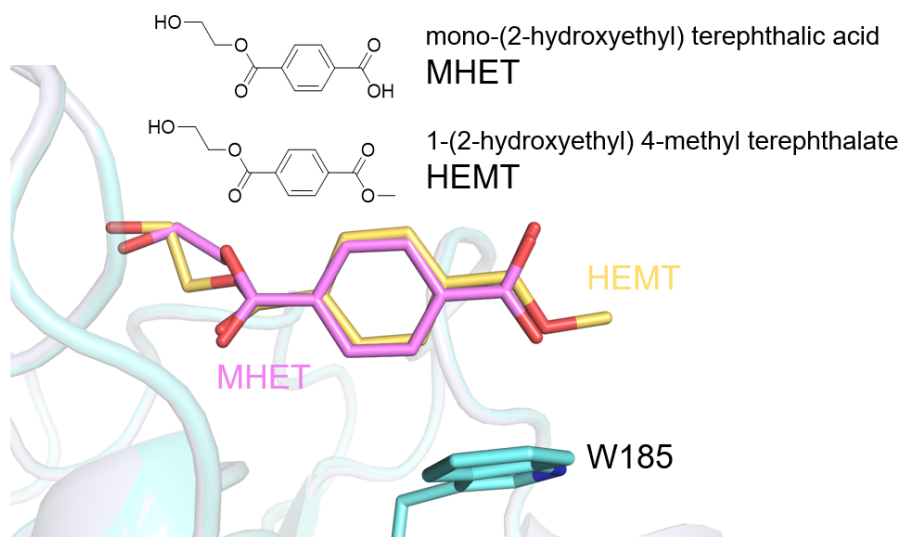

**Supplementary Fig. 10.** The comparison of MHET- (PDB ID: 7XTW) and HEMT-bound (PDB ID: 5XH3) *IsPETase* complex. The MHET and HEMT are shown as sticks in pink and yellow respectively.



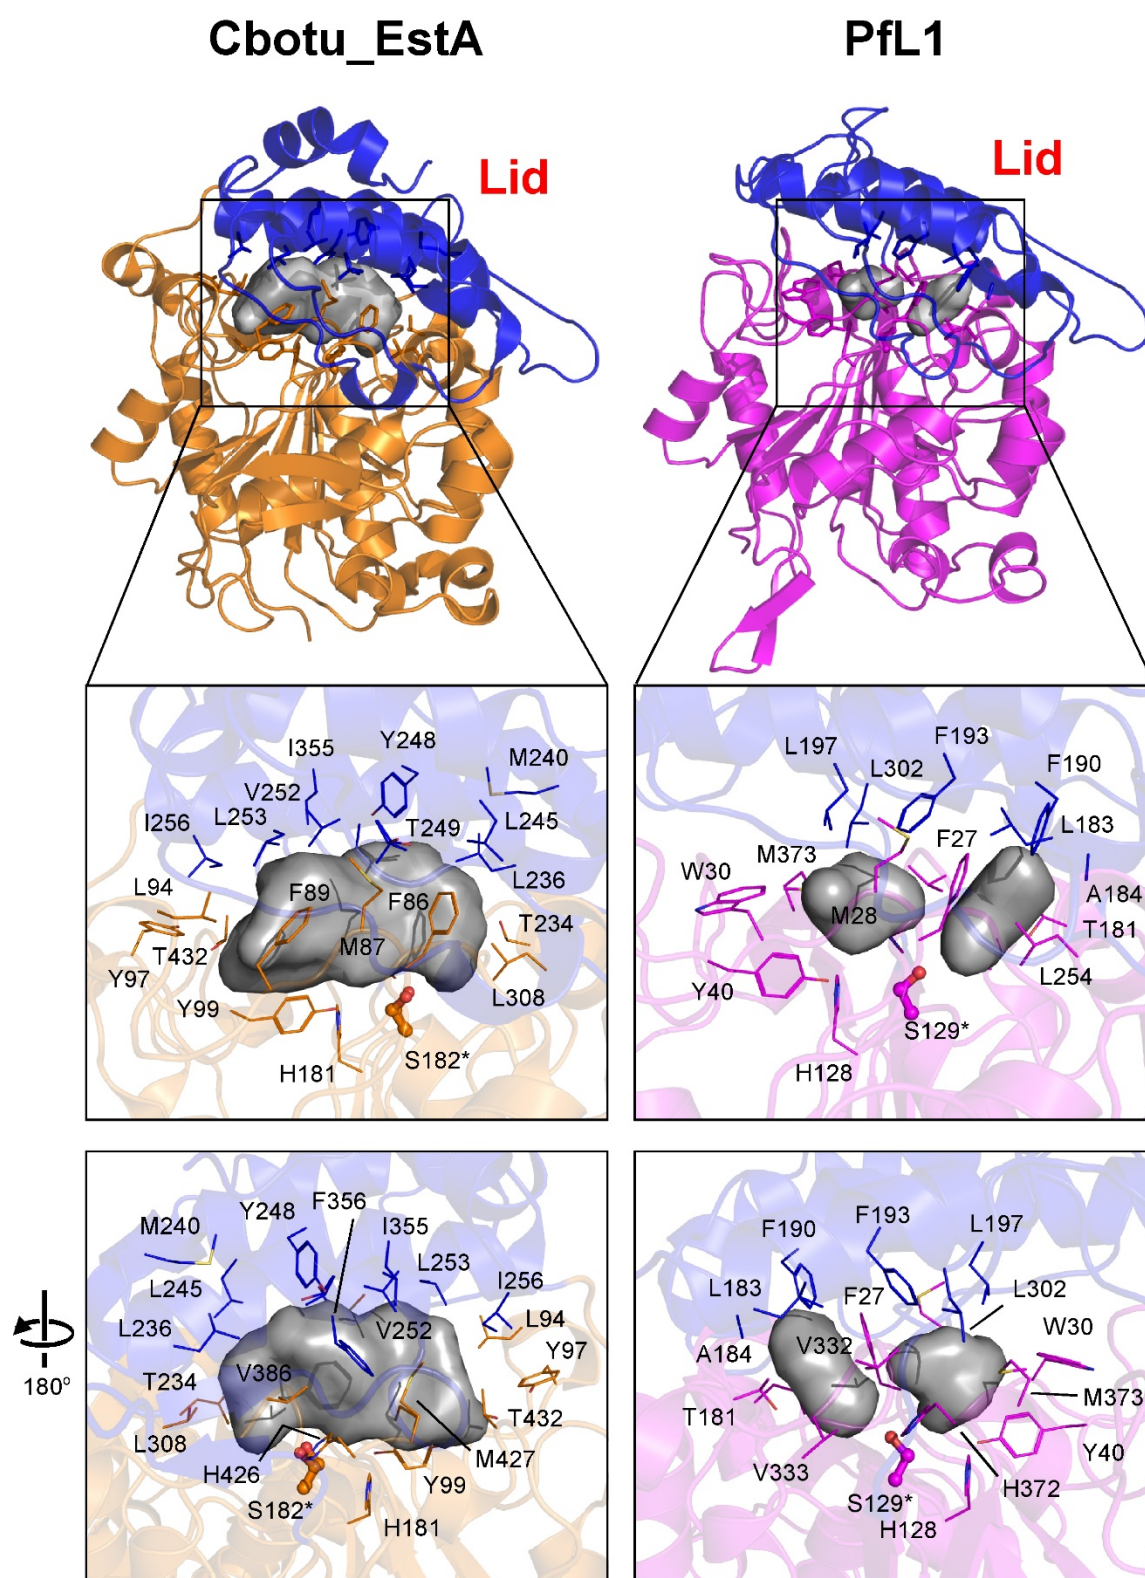

**Supplementary Fig. 11.** The active site pocket in the structures of Cbotu\_EstA (PDB ID: 5AH1) and PfL1 (PDB ID: 5AH0). The cartoon models of both structures are shown on the top with respective lid domain colored in red. The putative substrate-binding pocket adjacent the catalytic residue are shown in the zoom-in views. The pocket-forming residues are shown in lines and the catalytic Ser are shown in stick and ball models.



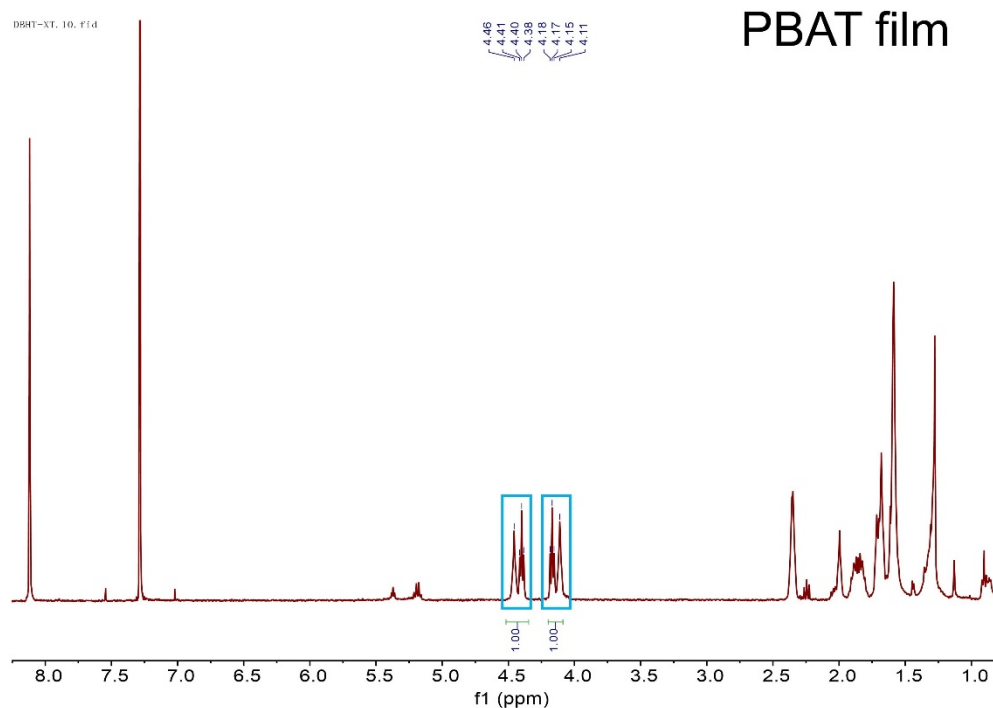

**Supplementary Fig. 12.**  $^1\text{H}$  NMR ( $\text{CDCl}_3$ , 400 MHz) of the PBAT film used in this study. The ratio of Ada to TPA was calculated based on the peaks on 4.1 and 4.4 (boxed in blue) according to the method described by Hoe *et al.*<sup>6</sup>.

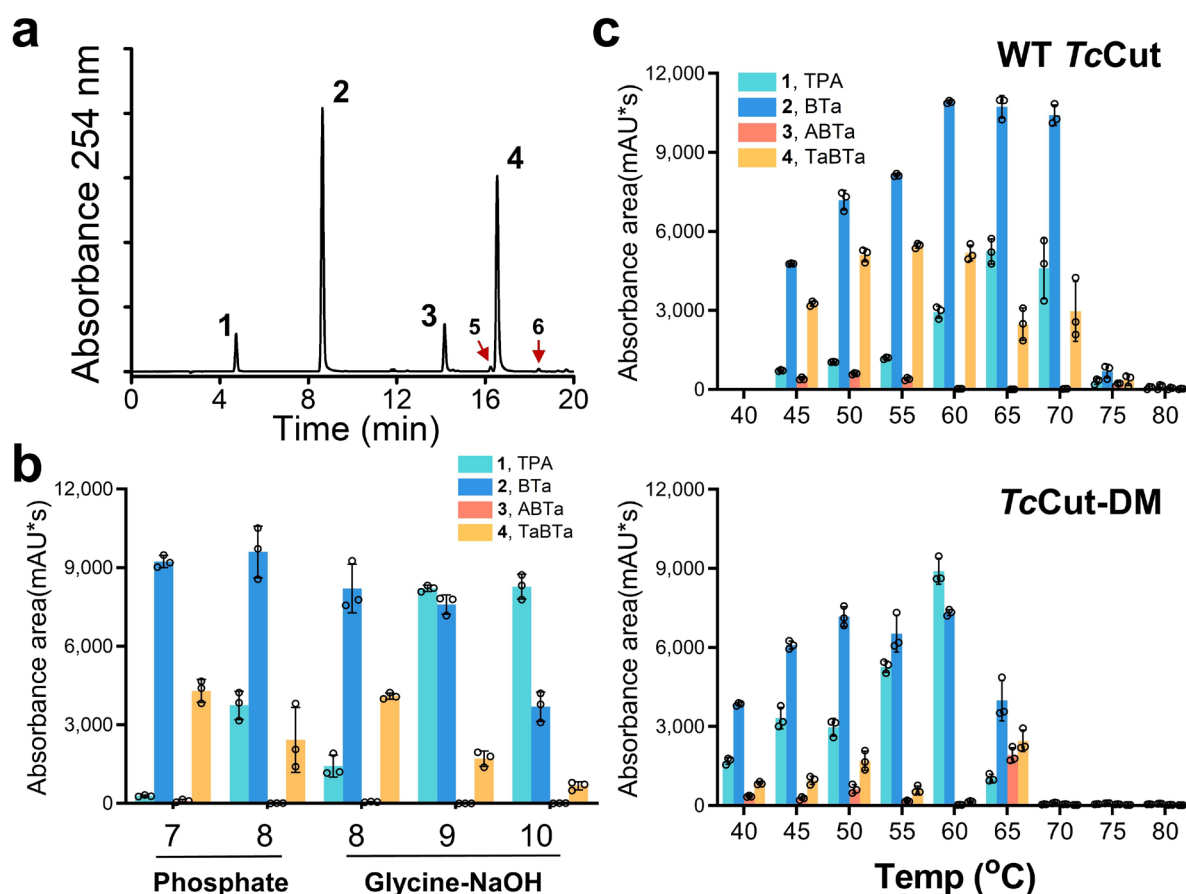

**Supplementary Fig. 13.** The characterization of *TcCut* in degrading PBAT. **a**, HPLC profile of *TcCut*-mediated PBAT degradation. The identities of compounds **1** - **6** are the same as those in *TfCut*-mediated PBAT hydrolytic products. **b**, Effect of pH on PBAT degradation of *TcCut* was estimated at 60 °C for 12 h. **c**, The temperature-dependent PBAT degradation rates of WT *TcCut* (upper panel) and *TcCut*-DM (lower panel) were determined at 12 h by HPLC. Triplicate assay was conducted. Data are presented as mean values +/- standard deviation. The individual data points are shown as black circles. Source data are provided as a Source Data file

## Supplementary References:

1. Biundo, A. *et al.* Characterization of a poly(butylene adipate-co-terephthalate)-hydrolyzing lipase from *Pelosinus fermentans*. *Appl. Microbiol. Biotechnol.* **100**, 1753-1764 (2016).
2. Wallace, P. W. *et al.* PpEst is a novel PBAT degrading polyesterase identified by proteomic screening of *Pseudomonas pseudoalcaligenes*. *Appl. Microbiol. Biotechnol.* **101**, 2291-2303 (2017).
3. Perz, V. *et al.* Hydrolysis of synthetic polyesters by *Clostridium botulinum* esterases. *Biotechnol. Bioeng.* **113**, 1024-1034 (2016).
4. Engh, R. A. & Huber, R. Accurate bond and angle parameters for X-ray protein structure refinement. *Acta Crystallogr. Section A* **47**, 392-400 (1991).
5. Chen, V. B. *et al.* MolProbity: all-atom structure validation for macromolecular crystallography. *Acta Crystallogr. D Biol. Crystallogr.* **66**, 12-21 (2010).
6. De Hoe, G. X. *et al.* Photochemical Transformation of Poly(butylene adipate- co-terephthalate) and Its Effects on Enzymatic Hydrolyzability. *Environ. Sci. Technol.* **53**, 2472-2481 (2019).
